# Supplementary material for: Prioritizing candidate disease miRNAs by integrating phenotype associations of multiple diseases with matched miRNA and mRNA expression profiles
Source: Royal Society of Chemistry journal article supplement (doi:10.1039/c4mb00353e), 2014-07-29
Supplement: c4mb00353e7.pdf [file c4mb00353e7.pdf]

Supplementary Table 2 The known disease-related miRNAs stored in miR2Disease and HMDD databases.

| Disease types                | miR2Disease | HMDD | NO. of union |
|------------------------------|-------------|------|--------------|
| Acute lymphoblastic leukemia | 15          | 27   | 30           |
| Breast cancer                | 33          | 64   | 66           |
| Germ cell tumor              | 2           | 1    | 2            |
| Glioblastoma                 | 10          | 42   | 43           |
| Hepatocellular carcinoma     | 39          | 65   | 71           |
| Lung Cancer                  | 24          | 29   | 44           |
| Multiple myeloma             | 17          | 7    | 20           |
| Ovarian cancer               | 42          | 34   | 55           |
| Pancreatic cancer            | 33          | 42   | 52           |
| Prostate cancer              | 40          | 38   | 51           |
| Renal cell carcinoma         | 2           | 37   | 37           |
